# Supplementary material
Source: Springer Nature journal article supplement (https://www.springermedizin.de/resource/supplementary/12883_2011_487_MOESM1_ESM.pdf/9455552)

# Subset of 10-10 EEG Electrodes

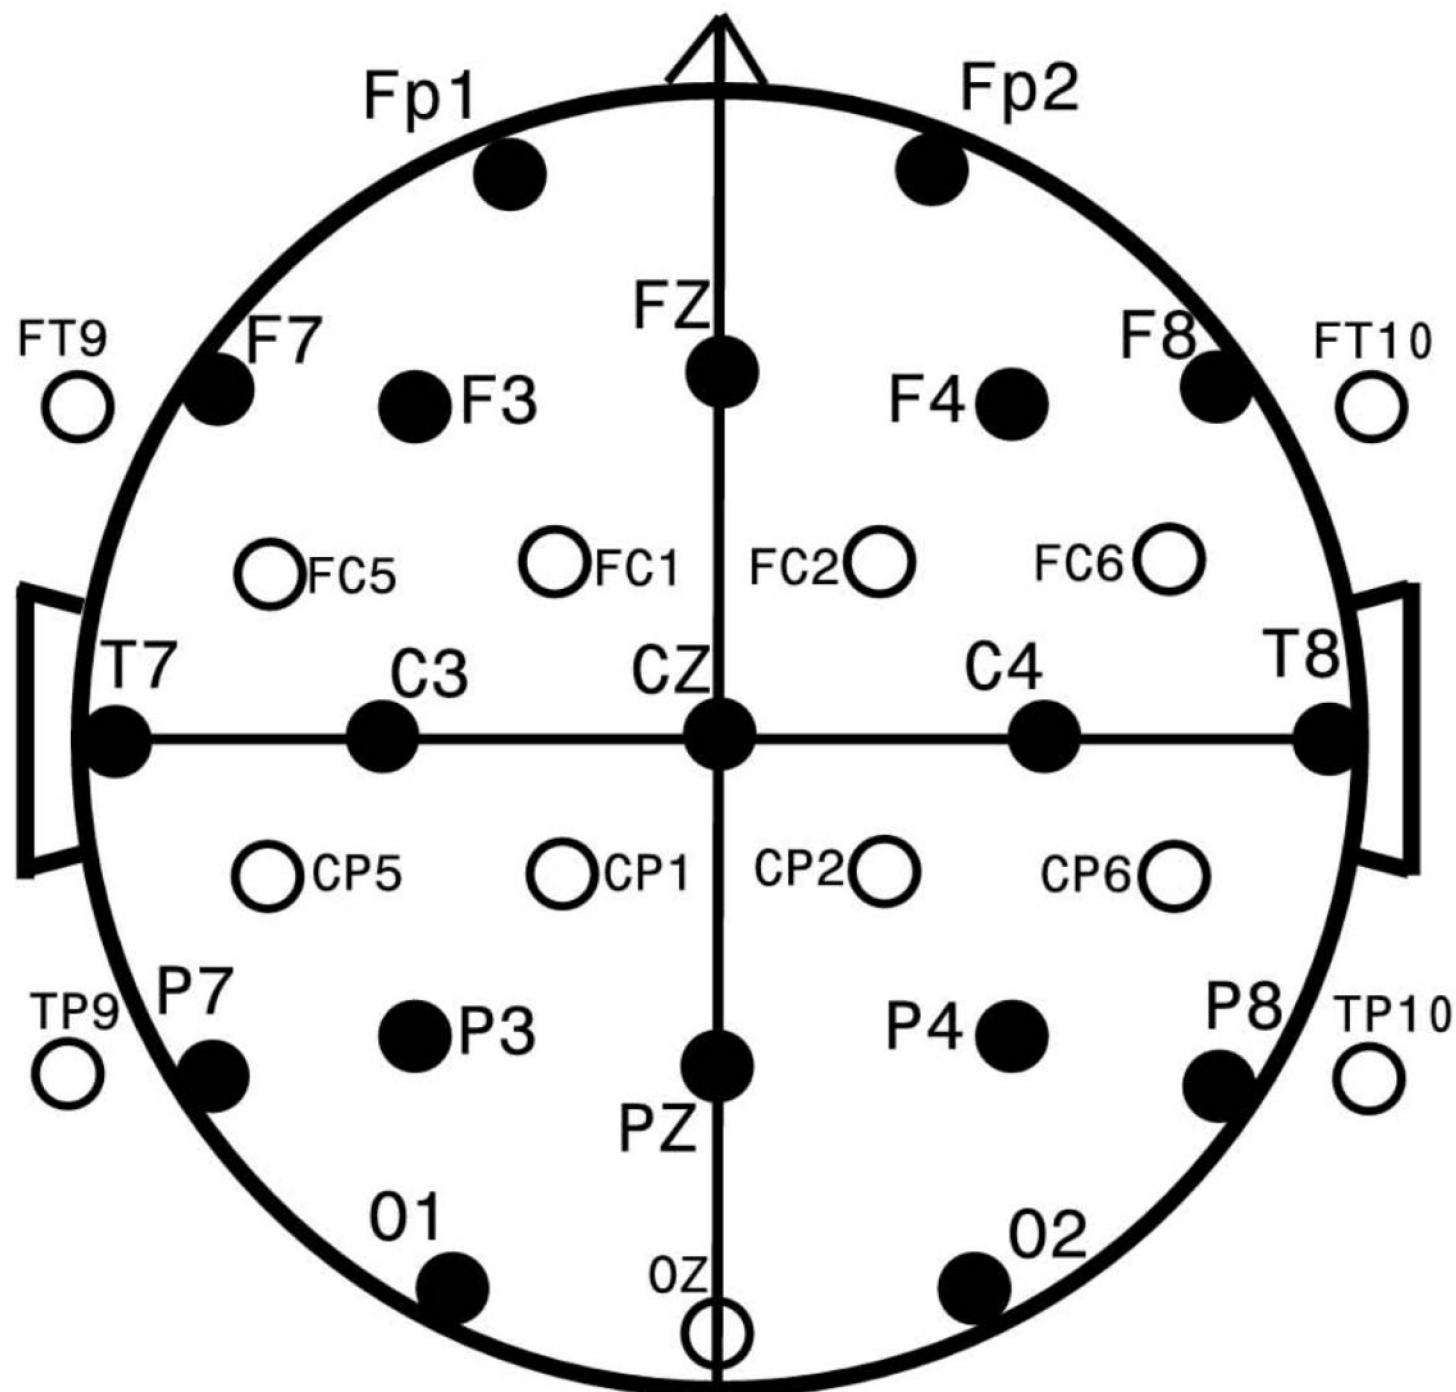

Supplement: MOESM1 [file 9455552]
